# Supplementary material for: NF-κB Decoy ODN-Loaded Poly(Lactic-co-glycolic Acid) Nanospheres Inhibit Alveolar Ridge Resorption
Source: MDPI journal article supplement (doi:10.3390/ijms24043699), 2023-02-12
Supplement: s1 [file s1]

# **NF- $\kappa$ B Decoy ODN-Loaded Poly(Lactic-co-glycolic Acid) Nanospheres Inhibit Alveolar Ridge Resorption**

Albert chun-shuo Huang, Yuji Ishida, Kai Li, Duantawan Rintanalert, Kasumi Hatano-Sato, Shuji Oishi, Jun Hosomichi, Risa Usumi-fujita, Hiroyuki Yamaguchi, Hiroyuki Tsujimoto, Aiko Sasai, Ayaka Ochi, Hajime Watanabe, Takashi Ono

## **Supplementary files**

**Supplementary Table S1. Vertical bone height loss in the extraction socket on day 7 and day 28**

**Supplementary Table S2. Trabecular bone analysis of extraction socket on day 7 and day 28**

**Supplementary Table S3. TRAP-positive cell ratio of extraction socket on day 7 and day 28**

**Supplementary Table S4. ALP-positive stained area ratio of extraction socket on day 7 and day 28**

**Supplementary Table S5. Percentage of immunopositive stained areas (%) of extraction socket on day 7 and day 28**

**Supplementary Table S6. Relative gene expression level of extraction socket on day 7 and day 28**

**Supplementary Figure S1. Schematic figure of decoy ODN and experimental timeline.**

**Supplementary Figure S2. Negative antigen (tissue) controls of anti-interleukin (IL)-1 $\beta$ , anti-tumor necrosis factor (TNF)- $\alpha$ , anti-transforming growth factor (TGF)- $\beta$ 1 and anti- receptor activator of nuclear factor-kappa B ligand (RANKL) in immunohistochemical staining.**

**Supplementary Table S1. Vertical bone height loss in the extraction socket on day 7 and day 28**

| Observation period | Vertical bone height loss | PBS |       |       |       | ScD |       |       |       | NfD |       |       |       | PLGA-ScD |       |       |       | PLGA-NfD |       |       |       | F (DFn, DFd)       | P Values     |
|--------------------|---------------------------|-----|-------|-------|-------|-----|-------|-------|-------|-----|-------|-------|-------|----------|-------|-------|-------|----------|-------|-------|-------|--------------------|--------------|
|                    |                           | n   | Mean  | SD    | SE    | n   | Mean  | SD    | SE    | n   | Mean  | SD    | SE    | n        | Mean  | SD    | SE    | n        | Mean  | SD    | SE    |                    |              |
| <b>D7</b>          | HBL (mm)                  | 5   | 0.725 | 0.068 | 0.030 | 5   | 0.715 | 0.041 | 0.018 | 5   | 0.598 | 0.067 | 0.030 | 5        | 0.682 | 0.055 | 0.024 | 5        | 0.508 | 0.070 | 0.031 | F (4, 20) = 11.170 | P<0.0001**** |
|                    | HML (mm)                  | 5   | 0.784 | 0.040 | 0.018 | 5   | 0.766 | 0.058 | 0.026 | 5   | 0.689 | 0.059 | 0.027 | 5        | 0.719 | 0.066 | 0.030 | 5        | 0.606 | 0.035 | 0.016 | F (4, 20) = 8.860  | P=0.0003***  |
|                    | HPL (mm)                  | 5   | 0.523 | 0.027 | 0.012 | 5   | 0.525 | 0.048 | 0.021 | 5   | 0.499 | 0.081 | 0.036 | 5        | 0.500 | 0.071 | 0.032 | 5        | 0.410 | 0.048 | 0.022 | F (4, 20) = 3.264  | P=0.0325*    |
|                    | HM (mm)                   | 5   | 0.198 | 0.014 | 0.006 | 5   | 0.142 | 0.028 | 0.013 | 5   | 0.120 | 0.019 | 0.008 | 5        | 0.125 | 0.028 | 0.013 | 5        | 0.140 | 0.043 | 0.019 | F (4, 20) = 5.985  | P=0.00257*   |
|                    | HD (mm)                   | 5   | 0.654 | 0.026 | 0.011 | 5   | 0.643 | 0.036 | 0.016 | 5   | 0.612 | 0.038 | 0.017 | 5        | 0.615 | 0.063 | 0.028 | 5        | 0.552 | 0.054 | 0.024 | F (4, 20) = 3.865  | P=0.0175*    |
| <b>D28</b>         | HBL (mm)                  | 5   | 0.993 | 0.070 | 0.031 | 5   | 0.961 | 0.047 | 0.021 | 5   | 0.939 | 0.084 | 0.038 | 5        | 0.918 | 0.044 | 0.020 | 5        | 0.838 | 0.057 | 0.025 | F (4, 20) = 4.443  | P=0.0099**   |
|                    | HML (mm)                  | 5   | 0.904 | 0.043 | 0.019 | 5   | 0.891 | 0.042 | 0.019 | 5   | 0.817 | 0.054 | 0.024 | 5        | 0.847 | 0.068 | 0.030 | 5        | 0.787 | 0.071 | 0.032 | F (4, 20) = 3.739  | P=0.0198*    |
|                    | HPL (mm)                  | 5   | 0.795 | 0.052 | 0.023 | 5   | 0.775 | 0.034 | 0.015 | 5   | 0.784 | 0.042 | 0.019 | 5        | 0.784 | 0.048 | 0.021 | 5        | 0.675 | 0.029 | 0.013 | F (4, 20) = 6.985  | P=0.0011**   |
|                    | HM (mm)                   | 5   | 0.542 | 0.038 | 0.017 | 5   | 0.493 | 0.042 | 0.019 | 5   | 0.513 | 0.032 | 0.014 | 5        | 0.474 | 0.064 | 0.029 | 5        | 0.390 | 0.036 | 0.016 | F (4, 20) = 8.270  | P=0.0004***  |
|                    | HD (mm)                   | 5   | 0.680 | 0.052 | 0.023 | 5   | 0.681 | 0.041 | 0.018 | 5   | 0.667 | 0.044 | 0.020 | 5        | 0.604 | 0.062 | 0.023 | 5        | 0.538 | 0.045 | 0.020 | F (4, 20) = 8.828  | P=0.0003***  |

Abbreviations: HBL, buccal height loss of extraction socket; HML, middle height loss of extraction socket; HPL, palatal height loss of extraction socket; HM, mesial height loss of extraction socket; HD, distal height loss of extraction socket.; D7, post-extraction day 7; D28, post-extraction day 28; PBS, PBS group; ScD, naked scrambled decoy group; NfD, naked NF-κB decoy group; PLGA-ScD, Scrambled decoy ODN-loaded PLGA Nanosphere group; PLGA-NfD, NF-κB decoy ODN-loaded PLGA nanosphere group.

**Supplementary Table S2. Trabecular bone analysis of extraction socket on day 7 and day 28**

| Observation period | Trabecular bone Parameters   | n | PBS      |          |          | n | ScD      |          |          | n | NfD      |          |          | n | PLGA-ScD |          |          | n | PLGA-NfD |          |          | F (DFn, DFd)       | P Values    |
|--------------------|------------------------------|---|----------|----------|----------|---|----------|----------|----------|---|----------|----------|----------|---|----------|----------|----------|---|----------|----------|----------|--------------------|-------------|
|                    |                              |   | Mean     | SD       | SE       |                    |             |
| <b>D7</b>          | BV/TV (%)                    | 5 | 42.11    | 5.06     | 2.26     | 5 | 41.14    | 3.13     | 1.40     | 5 | 50.54    | 3.17     | 1.42     | 5 | 43.79    | 4.23     | 1.89     | 5 | 56.77    | 5.65     | 2.53     | F (4, 20) = 11.661 | P<0.0001*** |
|                    | BS/BV (1/mm)                 | 5 | 45.31    | 6.31     | 2.82     | 5 | 48.31    | 6.26     | 2.80     | 5 | 38.16    | 4.59     | 2.05     | 5 | 51.47    | 5.99     | 2.68     | 5 | 32.65    | 6.17     | 2.76     | F (4, 20) = 8.467  | P=0.0004*** |
|                    | BMD (mg/cm <sup>3</sup> )    | 5 | 417.61   | 65.98    | 29.51    | 5 | 409.50   | 50.76    | 22.70    | 5 | 516.40   | 65.84    | 29.44    | 5 | 419.20   | 41.14    | 18.40    | 5 | 611.40   | 56.07    | 25.08    | F (4, 20) = 12.040 | P<0.0001*** |
|                    | Tb.Th (µm)                   | 5 | 38.91    | 5.26     | 2.35     | 5 | 38.95    | 6.92     | 3.09     | 5 | 48.02    | 5.23     | 2.34     | 5 | 42.42    | 4.39     | 1.96     | 5 | 52.52    | 5.59     | 2.50     | F (4, 20) = 5.814  | P=0.0028**  |
|                    | Tb.N (1/mm)                  | 5 | 9.48     | 2.72     | 1.22     | 5 | 10.20    | 2.46     | 1.10     | 5 | 14.76    | 3.23     | 1.45     | 5 | 10.52    | 2.36     | 1.05     | 5 | 17.98    | 3.58     | 1.60     | F (4, 20) = 7.907  | P=0.0005*** |
|                    | Tb.Sp (µm)                   | 5 | 59.79    | 5.73     | 2.56     | 5 | 55.68    | 7.00     | 3.13     | 5 | 49.93    | 7.01     | 3.13     | 5 | 59.64    | 2.65     | 1.19     | 5 | 45.17    | 4.89     | 2.19     | F (4, 20) = 6.286  | P=0.0019**  |
|                    | Tb.Spac (µm)                 | 5 | 123.80   | 11.64    | 5.21     | 5 | 125.00   | 14.27    | 6.38     | 5 | 105.80   | 7.90     | 3.53     | 5 | 124.90   | 11.17    | 5.00     | 5 | 94.54    | 11.04    | 4.94     | F (4, 20) = 7.516  | P=0.0007*** |
|                    | V*m.space (mm <sup>3</sup> ) | 5 | 1.93E-02 | 1.92E-03 | 8.58E-04 | 5 | 1.75E-02 | 3.23E-03 | 1.45E-03 | 5 | 1.37E-02 | 2.17E-03 | 9.71E-04 | 5 | 1.73E-02 | 3.19E-03 | 1.43E-03 | 5 | 1.22E-02 | 4.10E-03 | 1.83E-03 | F (4, 20) = 4.633  | P=0.0082**  |
| <b>D28</b>         | V*tr (mm <sup>3</sup> )      | 5 | 1.72E-02 | 7.37E-03 | 3.30E-03 | 5 | 1.74E-02 | 8.17E-03 | 3.66E-03 | 5 | 3.12E-02 | 1.07E-02 | 4.78E-03 | 5 | 1.63E-02 | 6.41E-03 | 2.87E-03 | 5 | 4.54E-02 | 1.28E-02 | 5.71E-03 | F (4, 20) = 9.232  | P=0.0002*** |
|                    | BV/TV (%)                    | 5 | 54.42    | 4.96     | 2.22     | 5 | 51.86    | 5.04     | 2.26     | 5 | 54.15    | 5.57     | 2.49     | 5 | 54.50    | 8.88     | 3.97     | 5 | 67.39    | 6.89     | 3.08     | F (4, 20) = 4.633  | P=0.0082**  |
|                    | BS/BV (1/mm)                 | 5 | 37.09    | 4.97     | 2.22     | 5 | 40.77    | 3.17     | 1.42     | 5 | 42.23    | 2.95     | 1.32     | 5 | 39.57    | 5.82     | 2.60     | 5 | 28.09    | 5.99     | 2.68     | F (4, 20) = 6.976  | P=0.0011**  |
|                    | BMD (mg/cm <sup>3</sup> )    | 5 | 560.70   | 92.33    | 41.29    | 5 | 588.70   | 52.65    | 23.55    | 5 | 590.90   | 67.53    | 30.20    | 5 | 616.30   | 77.82    | 34.80    | 5 | 745.40   | 68.70    | 30.72    | F (4, 20) = 4.946  | P=0.0062**  |
|                    | Tb.Th (µm)                   | 5 | 52.41    | 4.38     | 1.96     | 5 | 49.41    | 4.96     | 2.22     | 5 | 52.27    | 2.75     | 1.23     | 5 | 51.70    | 3.79     | 1.70     | 5 | 60.80    | 4.81     | 2.15     | F (4, 20) = 5.334  | P=0.0043**  |
|                    | Tb.N (1/mm)                  | 5 | 16.44    | 3.49     | 1.56     | 5 | 15.62    | 2.32     | 1.04     | 5 | 18.92    | 3.01     | 1.34     | 5 | 15.57    | 4.17     | 1.86     | 5 | 22.89    | 3.95     | 1.77     | F (4, 20) = 4.064  | P=0.0143*   |
|                    | Tb.Sp (µm)                   | 5 | 29.86    | 3.13     | 1.40     | 5 | 31.29    | 6.27     | 2.80     | 5 | 26.03    | 4.97     | 2.22     | 5 | 29.66    | 7.44     | 3.33     | 5 | 18.86    | 4.58     | 2.05     | F (4, 20) = 4.194  | P=0.0126*   |
|                    | Tb.Spac (µm)                 | 5 | 84.54    | 7.45     | 3.33     | 5 | 73.02    | 13.13    | 5.87     | 5 | 68.68    | 10.83    | 4.85     | 5 | 83.79    | 12.84    | 5.74     | 5 | 53.34    | 13.62    | 6.09     | F (4, 20) = 5.878  | P=0.0027**  |
|                    | V*m.space (mm <sup>3</sup> ) | 5 | 1.28E-02 | 1.54E-03 | 6.88E-04 | 5 | 1.32E-02 | 2.40E-03 | 1.07E-03 | 5 | 1.15E-02 | 1.59E-03 | 7.11E-04 | 5 | 1.20E-02 | 1.62E-03 | 7.22E-04 | 5 | 7.29E-03 | 1.63E-03 | 7.31E-04 | F (4, 20) = 8.845  | P=0.0003*** |
|                    | V*tr (mm <sup>3</sup> )      | 5 | 4.96E-02 | 1.11E-02 | 4.95E-03 | 5 | 6.29E-02 | 1.09E-02 | 4.87E-03 | 5 | 6.27E-02 | 1.40E-02 | 6.25E-03 | 5 | 4.83E-02 | 1.62E-02 | 7.25E-03 | 5 | 7.64E-02 | 2.01E-02 | 8.98E-03 | F (4, 20) = 3.001  | P=0.0432*   |

Abbreviations: BV/TV, bone volume fraction (%); BS/BV, bone surface ratio (per mm); BMD, bone mineral density (mg/cm<sup>3</sup>); Tb.Th, trabecular thickness (µm); Tb.N, trabecular number (per mm); Tb.Sp, trabecular separation (µm); Tb.Spac, trabecular spacing (µm); V\*m.space, bone marrow space star volume (mm<sup>3</sup>); V\*tr, trabecular star volume (mm<sup>3</sup>); D7, post-extraction day 7; D28, post-extraction day 28; PBS, PBS group; ScD, naked scrambled decoy group; NfD, naked NF-κB decoy group; PLGA-ScD, Scrambled decoy ODN-loaded PLGA Nanosphere group; PLGA-NfD, NF-κB decoy ODN-loaded PLGA nanosphere group.

**Supplementary Table S3. TRAP positive cell ratio of extraction socket on day 7 and day 28**

| Observation period | TRAP-positive cell ratio                                | PBS |       |      |      | ScD |       |      |      | NfD |       |      |      | PLGA-ScD |       |      |      | PLGA-NfD |       |      |      | F (DFn, DFd)       | P Values     |
|--------------------|---------------------------------------------------------|-----|-------|------|------|-----|-------|------|------|-----|-------|------|------|----------|-------|------|------|----------|-------|------|------|--------------------|--------------|
|                    |                                                         | n   | Mean  | SD   | SE   | n   | Mean  | SD   | SE   | n   | Mean  | SD   | SE   | n        | Mean  | SD   | SE   | n        | Mean  | SD   | SE   |                    |              |
| <b>D7</b>          | Number of TRAP-positive stained cells / mm <sup>2</sup> | 5   | 25.06 | 3.13 | 1.40 | 5   | 24.08 | 2.95 | 1.32 | 5   | 17.69 | 3.14 | 1.41 | 5        | 24.53 | 4.85 | 2.17 | 5        | 10.94 | 2.32 | 1.04 | F (4, 20) = 16.281 | P<0.0001**** |
| <b>D28</b>         | Number of TRAP-positive stained cells / mm <sup>2</sup> | 5   | 19.92 | 4.65 | 2.08 | 5   | 17.12 | 2.14 | 0.96 | 5   | 16.74 | 3.63 | 1.62 | 5        | 19.15 | 2.71 | 1.21 | 5        | 9.99  | 2.62 | 1.17 | F (4, 20) = 7.169  | P=0.0009***  |

Abbreviations: D7, post-extraction day 7; D28, post-extraction day 28; PBS, PBS group; ScD, naked scrambled decoy group; NfD, naked NF-κB decoy group; PLGA-ScD, Scrambled decoy ODN-loaded PLGA Nanosphere group; PLGA-NfD, NF-κB decoy ODN-loaded PLGA nanosphere group.

**Supplementary Table S4. ALP positive stained area ratio of extraction socket on day 7 and day 28**

| Observation period | ALP-positive area ratio             | PBS |      |      |      | ScD |      |      |      | NfD |      |      |      | PLGA-ScD |       |      |      | PLGA-NfD |       |      |      | F (DFn, DFd)      | P Values    |
|--------------------|-------------------------------------|-----|------|------|------|-----|------|------|------|-----|------|------|------|----------|-------|------|------|----------|-------|------|------|-------------------|-------------|
|                    |                                     | n   | Mean | SD   | SE   | n   | Mean | SD   | SE   | n   | Mean | SD   | SE   | n        | Mean  | SD   | SE   | n        | Mean  | SD   | SE   |                   |             |
| <b>D7</b>          | ALP-positive stained area ratio (%) | 5   | 7.80 | 4.63 | 2.07 | 5   | 7.63 | 4.53 | 2.03 | 5   | 9.36 | 3.27 | 1.46 | 5        | 11.94 | 4.33 | 1.93 | 5        | 20.17 | 3.22 | 1.44 | F (4, 20) = 8.302 | P=0.0004*** |
| <b>D28</b>         | ALP-positive stained area ratio (%) | 5   | 9.85 | 4.30 | 1.92 | 5   | 8.72 | 3.36 | 1.50 | 5   | 7.32 | 2.59 | 1.16 | 5        | 8.14  | 3.70 | 1.66 | 5        | 14.58 | 3.02 | 1.35 | F (4, 20) = 3.468 | P=0.0262*   |

Abbreviations: D7, post-extraction day 7; D28, post-extraction day 28; PBS, PBS group; ScD, naked scrambled decoy group; NfD, naked NF-κB decoy group; PLGA-ScD, Scrambled decoy ODN-loaded PLGA Nanosphere group; PLGA-NfD, NF-κB decoy ODN-loaded PLGA nanosphere group.

**Supplementary Table S5. Percentage of immunopositive stained areas (%) of extraction socket on day 7 and day 28**

| Immunohistochemical markers | Observation period | PBS |       |      |      | ScD |       |      |      | NfD |       |      |      | PLGA-ScD |       |      |      | PLGA-NfD |       |      |      | F (DFn, DFd)       | P Values     |
|-----------------------------|--------------------|-----|-------|------|------|-----|-------|------|------|-----|-------|------|------|----------|-------|------|------|----------|-------|------|------|--------------------|--------------|
|                             |                    | n   | Mean  | SD   | SE   | n   | Mean  | SD   | SE   | n   | Mean  | SD   | SE   | n        | Mean  | SD   | SE   | n        | Mean  | SD   | SE   |                    |              |
| IL-1 beta                   | D7                 | 5   | 20.56 | 2.82 | 1.26 | 5   | 19.76 | 4.70 | 2.10 | 5   | 13.58 | 3.03 | 1.36 | 5        | 18.12 | 2.95 | 1.32 | 5        | 9.29  | 2.65 | 1.18 | F (4, 20) = 10.240 | P=0.0001***  |
|                             | D28                | 5   | 8.36  | 2.21 | 0.99 | 5   | 9.03  | 3.74 | 1.67 | 5   | 6.81  | 1.51 | 0.68 | 5        | 7.81  | 2.33 | 1.04 | 5        | 2.81  | 1.07 | 0.48 | F (4, 20) = 5.458  | P=0.0039**   |
| TNF-alpha                   | D7                 | 5   | 15.54 | 2.97 | 1.33 | 5   | 14.28 | 2.34 | 1.05 | 5   | 11.71 | 2.33 | 1.04 | 5        | 13.43 | 2.23 | 0.99 | 5        | 6.44  | 1.91 | 0.85 | F (4, 20) = 11.101 | P<0.0001**** |
|                             | D28                | 5   | 10.86 | 1.66 | 0.74 | 5   | 10.51 | 2.30 | 1.03 | 5   | 9.61  | 2.06 | 0.92 | 5        | 9.99  | 3.00 | 1.34 | 5        | 4.28  | 1.67 | 0.75 | F (4, 20) = 7.602  | P=0.0007***  |
| TGF-beta 1                  | D7                 | 5   | 18.30 | 3.03 | 1.36 | 5   | 17.15 | 2.71 | 1.21 | 5   | 22.91 | 4.11 | 1.84 | 5        | 17.92 | 3.59 | 1.60 | 5        | 30.62 | 3.67 | 1.64 | F (4, 20) = 13.270 | P<0.0001**** |
|                             | D28                | 5   | 21.36 | 3.47 | 1.55 | 5   | 22.11 | 4.29 | 1.92 | 5   | 23.75 | 2.04 | 0.91 | 5        | 23.23 | 3.44 | 1.54 | 5        | 31.75 | 3.88 | 1.74 | F (4, 20) = 7.139  | P=0.0010***  |
| RANKL                       | D7                 | 5   | 16.34 | 2.39 | 1.07 | 5   | 18.63 | 2.06 | 0.92 | 5   | 13.82 | 2.00 | 0.89 | 5        | 16.90 | 2.19 | 0.98 | 5        | 9.77  | 1.80 | 0.80 | F (4, 20) = 13.450 | P<0.0001**** |
|                             | D28                | 5   | 12.27 | 1.67 | 0.75 | 5   | 11.99 | 2.04 | 0.91 | 5   | 12.21 | 2.61 | 1.17 | 5        | 13.43 | 1.48 | 0.66 | 5        | 8.43  | 2.07 | 0.93 | F (4, 20) = 4.444  | P=0.0099**   |

Abbreviations: D7, post-extraction day 7; D28, post-extraction day 28; PBS, PBS group; ScD, naked scrambled decoy group; NfD, naked NF-κB decoy group; PLGA-ScD, Scrambled decoy ODN-loaded PLGA Nanosphere group; PLGA-NfD, NF-κB decoy ODN-loaded PLGA nanosphere group.

**Supplementary Table S6. Relative gene expression level of extraction socket on day 7 and day 28**

| RT-qPCR markers | Observation period | PBS |      |      |      | ScD |      |      |      | NfD |      |      |      | PLGA-ScD |      |      |      | PLGA-NfD |      |      |      | Kruskal-Wallis statistic | P Values  |
|-----------------|--------------------|-----|------|------|------|-----|------|------|------|-----|------|------|------|----------|------|------|------|----------|------|------|------|--------------------------|-----------|
|                 |                    | n   | Mean | SD   | SE   | n   | Mean | SD   | SE   | n   | Mean | SD   | SE   | n        | Mean | SD   | SE   | n        | Mean | SD   | SE   |                          |           |
| IL-1 beta       | D7                 | 5   | 1.04 | 0.22 | 0.10 | 5   | 1.09 | 0.37 | 0.16 | 5   | 0.81 | 0.15 | 0.07 | 5        | 0.95 | 0.20 | 0.09 | 5        | 0.52 | 0.21 | 0.10 | 12.68                    | P=0.0130* |
|                 | D28                | 5   | 1.05 | 0.21 | 0.10 | 5   | 0.92 | 0.24 | 0.11 | 5   | 0.86 | 0.16 | 0.07 | 5        | 0.90 | 0.15 | 0.07 | 5        | 0.59 | 0.19 | 0.09 | 11.44                    | P=0.0221* |
| TNF-alpha       | D7                 | 5   | 1.07 | 0.40 | 0.18 | 5   | 1.16 | 0.27 | 0.12 | 5   | 0.89 | 0.38 | 0.17 | 5        | 1.29 | 0.35 | 0.16 | 5        | 0.46 | 0.24 | 0.11 | 12.90                    | P=0.0118* |
|                 | D28                | 5   | 0.96 | 0.16 | 0.07 | 5   | 1.06 | 0.27 | 0.12 | 5   | 1.03 | 0.43 | 0.19 | 5        | 1.05 | 0.32 | 0.14 | 5        | 0.50 | 0.12 | 0.05 | 11.87                    | P=0.0183* |
| TGF-beta 1      | D7                 | 5   | 1.10 | 0.25 | 0.11 | 5   | 1.04 | 0.19 | 0.09 | 5   | 1.36 | 0.22 | 0.10 | 5        | 1.17 | 0.19 | 0.09 | 5        | 1.53 | 0.22 | 0.10 | 9.70                     | P=0.0459* |
|                 | D28                | 5   | 1.03 | 0.23 | 0.10 | 5   | 1.17 | 0.18 | 0.08 | 5   | 1.20 | 0.15 | 0.07 | 5        | 1.32 | 0.26 | 0.12 | 5        | 1.68 | 0.39 | 0.18 | 10.28                    | P=0.0360* |
| RANKL           | D7                 | 5   | 0.99 | 0.30 | 0.13 | 5   | 1.06 | 0.27 | 0.12 | 5   | 0.69 | 0.17 | 0.07 | 5        | 1.01 | 0.24 | 0.11 | 5        | 0.49 | 0.20 | 0.09 | 12.55                    | P=0.0137* |
|                 | D28                | 5   | 1.11 | 0.18 | 0.08 | 5   | 1.05 | 0.19 | 0.09 | 5   | 0.97 | 0.18 | 0.08 | 5        | 1.01 | 0.22 | 0.10 | 5        | 0.69 | 0.13 | 0.06 | 10.70                    | P=0.0301* |
| OPG             | D7                 | 5   | 1.02 | 0.20 | 0.09 | 5   | 0.97 | 0.12 | 0.05 | 5   | 0.86 | 0.17 | 0.08 | 5        | 0.93 | 0.25 | 0.11 | 5        | 0.62 | 0.13 | 0.06 | 10.27                    | P=0.0361* |
|                 | D28                | 5   | 1.01 | 0.14 | 0.06 | 5   | 1.08 | 0.10 | 0.04 | 5   | 0.99 | 0.13 | 0.06 | 5        | 0.96 | 0.21 | 0.09 | 5        | 0.73 | 0.08 | 0.03 | 10.55                    | P=0.0322* |
| RANKL/OPG ratio | D7                 | 5   | 1.07 | 0.34 | 0.15 | 5   | 1.09 | 0.27 | 0.12 | 5   | 0.83 | 0.27 | 0.12 | 5        | 1.20 | 0.35 | 0.16 | 5        | 0.62 | 0.19 | 0.09 | 10.51                    | P=0.0327* |
|                 | D28                | 5   | 1.12 | 0.16 | 0.07 | 5   | 0.88 | 0.23 | 0.10 | 5   | 0.89 | 0.19 | 0.09 | 5        | 1.04 | 0.28 | 0.12 | 5        | 0.66 | 0.17 | 0.08 | 10.63                    | P=0.0311* |

Abbreviations: D7, post-extraction day 7; D28, post-extraction day 28; PBS, PBS group; ScD, naked scrambled decoy group; NfD, naked NF-κB decoy group; PLGA-ScD, Scrambled decoy ODN-loaded PLGA Nanosphere group; PLGA-NfD, NF-κB decoy ODN-loaded PLGA nanosphere group.

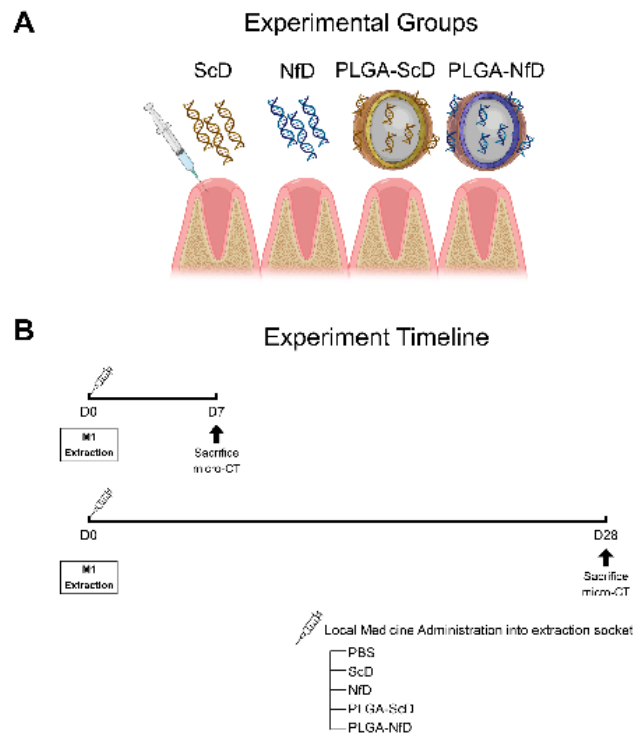

**Supplementary Figure S1.**

**A**, Schematic figure of decoy ODN nuclear medicine administered in experimental groups.

**B**, Experimental timeline.

Abbreviations: D0, immediate after extraction; D7, post-extraction day 7; D28, post-extraction day 28; PBS, PBS group; ScD, naked scrambled decoy group; NfD, naked NF- $\kappa$ B decoy group; PLGA-ScD, Scrambled decoy ODN-loaded PLGA Nanosphere group; PLGA-NfD, NF- $\kappa$ B decoy ODN-loaded PLGA nanosphere group.



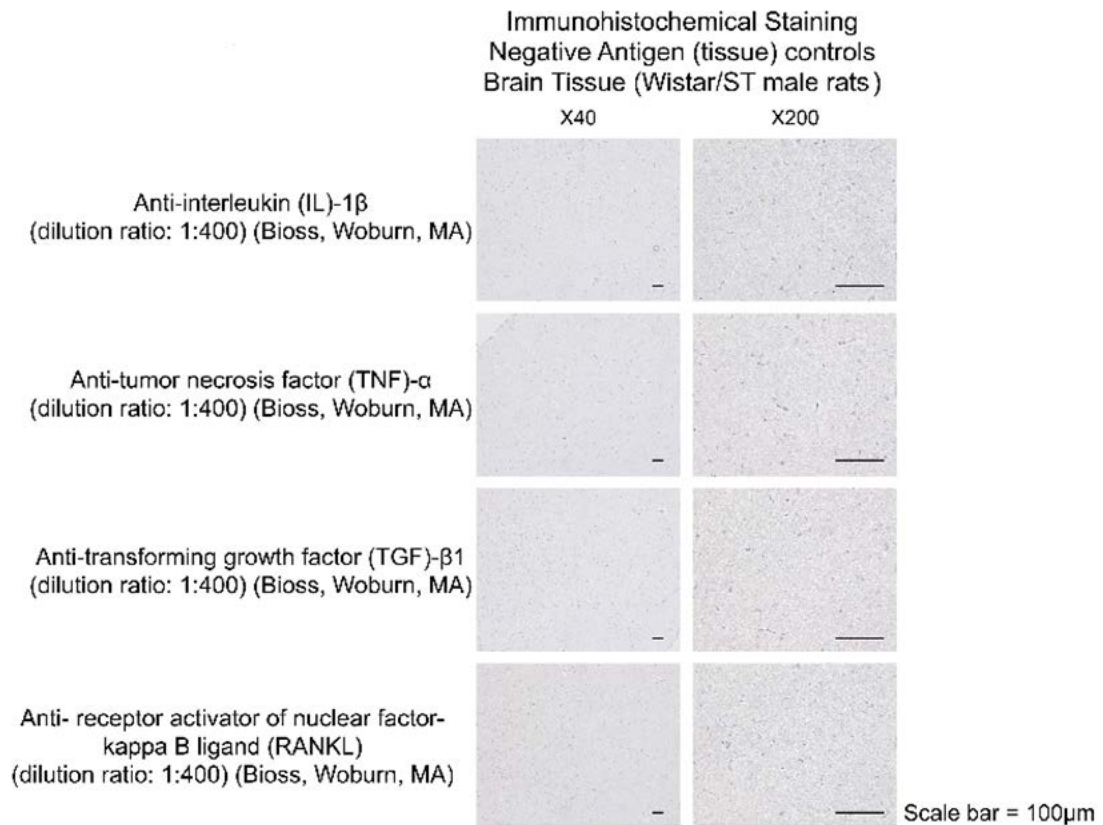

### Supplementary Figure S2.

Negative antigen (tissue) controls of anti-interleukin (IL)-1 $\beta$  (dilution ratio: 1:400) (Bioss, Woburn, MA), anti-tumor necrosis factor (TNF)- $\alpha$  (dilution ratio: 1:400) (Bioss, Woburn, MA), anti-transforming growth factor (TGF)- $\beta$ 1 (dilution ratio: 1:400) (Bioss, Woburn, MA) and anti- receptor activator of nuclear factor-kappa B ligand (RANKL) (dilution ratio: 1:400) (Bioss, Woburn, MA) in immunohistochemical staining. Brain tissues of Wistar/ST male rats were shown in the figure. Original magnification 40x and 200x. Scale Bar = 100  $\mu$ m.
